# Supplementary material for: Electrochemical performance of CeO 2 /MXene nanocomposites with enhanced capacitance and cycling stability for high-performance supercapacitors
Source: Royal Society of Chemistry journal article supplement (doi:10.1039/d5nj04263a), 2025-12-30
Supplement: d5nj04263a1.pdf [file d5nj04263a1.pdf]

## Supporting Information

### Electrochemical Performance of CeO<sub>2</sub>/MXene Nanocomposites with Enhanced Capacitance and Cycling Stability for High-Performance Supercapacitors

Ramya Raja<sup>1</sup>, Balasubramani. V<sup>2</sup>, Tamizharasan Selvakumar<sup>1</sup>, Abirami Natarajan<sup>1</sup>, Arulmozhi Rajaram<sup>1\*</sup>

<sup>1</sup>Department of Chemistry, Faculty of Engineering and Technology, SRM Institute of Science and Technology, Kattankulathur, 603203, Tamil Nadu, India.

<sup>2</sup>College of Chemical Engineering, Zhejiang University of Technology, Hangzhou 310032, China

\*Corresponding Author: [arulmozr@srmist.edu.in](mailto:arulmozr@srmist.edu.in)

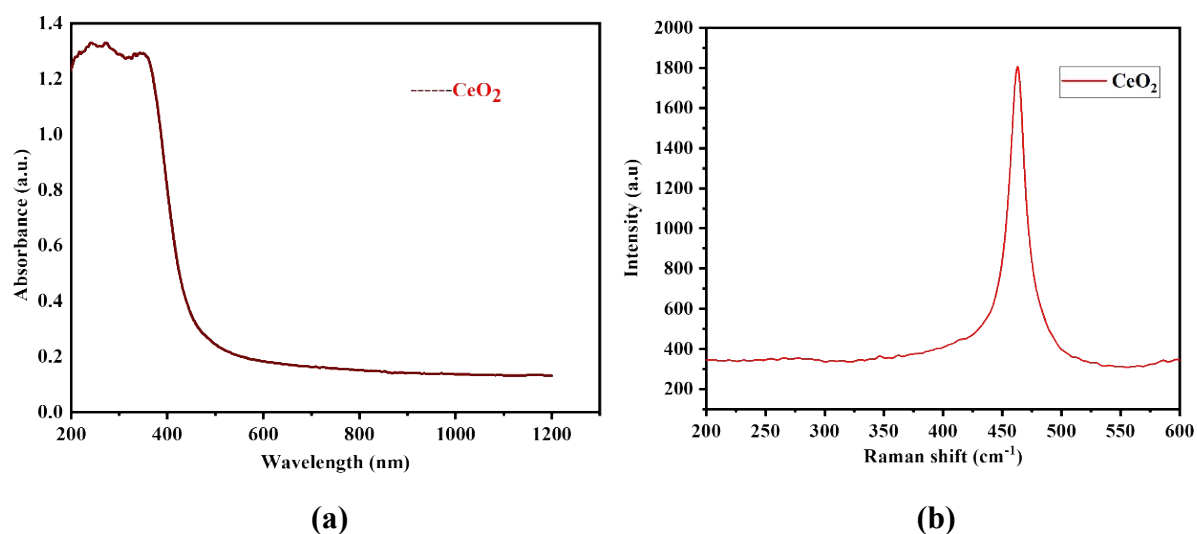

Figure. S1 (a) CeO<sub>2</sub> and (b) UV graph and Raman

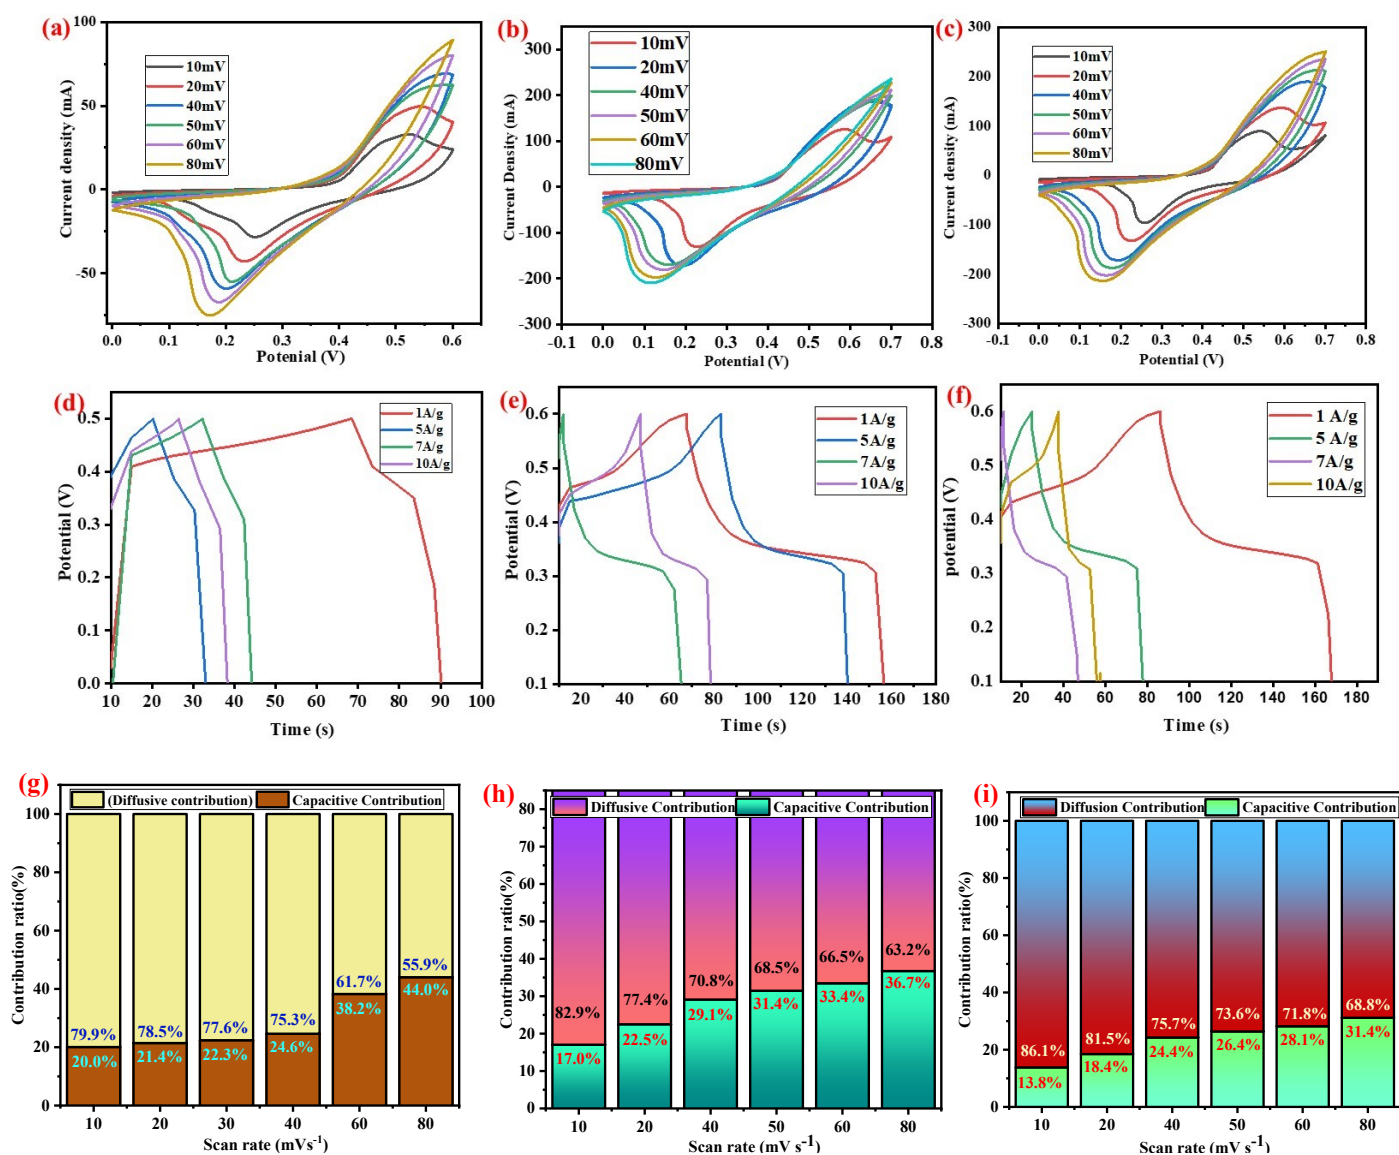

Figure S2. Electrochemical analysis of  $\text{CeO}_2$  and  $\text{CeO}_2/\text{MXene}$  composites: (a–c) CV curves of  $\text{CeO}_2$ , CM1, and CM2, (d–f) GCD curves, (g) EIS spectra, and (h–j) diffusion and capacitance contributions for  $\text{CeO}_2$ , CM1, and CM2.

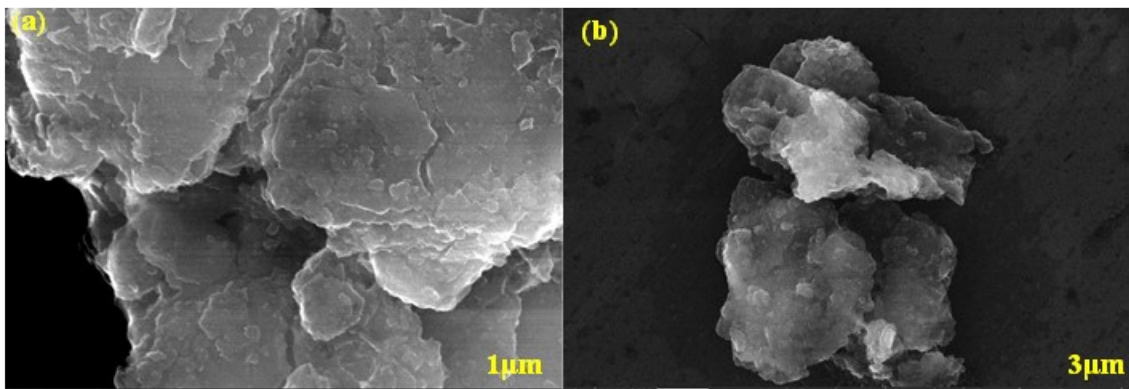

Figure S3. SEM images of MXene
